# Supplementary material
Source: Springer Nature journal article supplement (https://www.springermedizin.de/resource/supplementary/12885_2013_3910_MOESM1_ESM.pdf/9464762)
Supplement: MOESM1 [file 9464762]

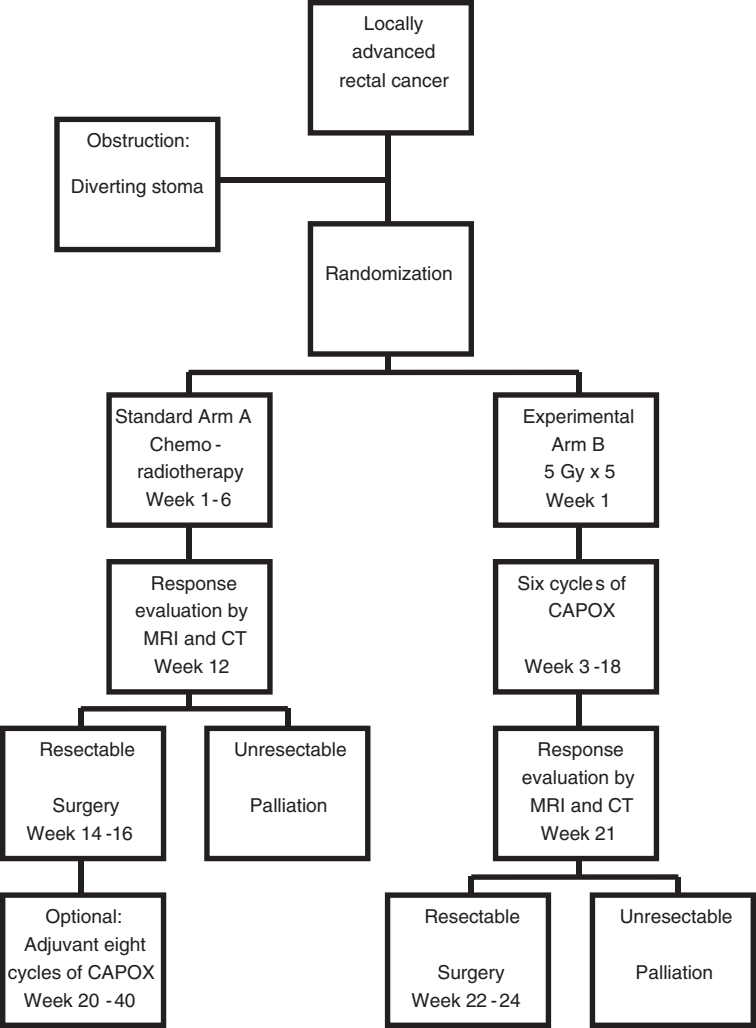

Locally  
advanced  
rectal cancer

Obstruction:  
Diverting stoma

Randomization

Standard Arm A  
Chemo -  
radiotherapy  
Week 1-6

Experimental  
Arm B  
5 Gy x 5  
Week 1

Response  
evaluation by  
MRI and CT  
Week 12

Six cycles of  
CAPOX  
Week 3-18

Resectable

Unresectable

Response  
evaluation by  
MRI and CT  
Week 21

Surgery  
Week 14-16

Palliation

Optional:  
Adjuvant eight  
cycles of CAPOX  
Week 20-40

Resectable

Unresectable

Surgery  
Week 22-24

Palliation
